# Supplementary material
Source: PubMed Central journal article supplement (PMC5812925)
Supplement: AEM.02203-17_zam005188355s1.pdf [file AEM.02203-17_zam005188355s1.pdf]

```

LVS ATGTTTCGATCAATTAGGCAATAGTGGAGCATTCTTATAAAATGCTATAGTTGCAGTTGTT 60
FSC200 ATGTTTCGATCAATTAGGCAATAGTGGAGCATTCTTATAAAATGCTATAGTTGCAGTTGTT 60
OSU18 ATGTTTCGATCAATTAGGCAATAGTGGAGCATTCTTATAAAATGCTATAGTTGCAGTTGTT 60
R13-38 ATGTTTCGATCAATTAGGCAATAGTGGAGCATTCTTATAAAATGCTATAGTTGCAGTTGTT 60

LVS ATTTTAGTTGTTGGCTTTTGGGCATCTAAGTATATAAAGTCTATTGTGTATAGCCTGTTG 120
FSC200 ATTTTAGTTGTTGGCTTTTGGGCATCTAAGTATATAAAGTCTATTGTGTATAGCCTGTTG 120
OSU18 ATTTTAGTTGTTGGCTTTTGGGCATCTAAGTATATAAAGTCTATTGTGTATAGCCTGTTG 120
R13-38 ATTTTAGTTGTTGGCTTTTGGGCATCTAAGTATATAAAGTCTATTGTGTATAGCCTGTTG 120

LVS AAAGAGTATGACAAGACAGTATCGCAATTTTAGCTAGTCTAGTTTACACAATTTTTTTA 180
FSC200 AAAGAGTATGACAAGACAGTATCGCAATTTTAGCTAGTCTAGTTTACACAATTTTTTTA 180
OSU18 AAAGAGTATGACAAGACAGTATCGCAATTTTAGCTAGTCTAGTTTACACAATTTTTTTA 180
R13-38 AAAGAGTATGACAAGACAGTATCGCAATTTTAGCTAGTCTAGTTTACACAATTTTTTTA 180

LVS GTGTTAGTGGTTGTAATTGCTTTAGCAAAGTTGGGGGTGCCGATATCTCCTGTGACAGGA 240
FSC200 GTGTTAGTGGTTGTAATTGCTTTAGCAAAGTTGGGGGTGCCGATATCTCCTGTGACAGGA 240
OSU18 GTGTTAGTGGTTGTAATTGCTTTAGCAAAGTTGGGGGTGCCGATATCTCCTGTGACAGGA 240
R13-38 GTGTTAGTGGTTGTAATTGCTTTAGCAAAGTTGGGGGTGCCGATATCTCCTGTGACAGGA 240

LVS GTTCTAACAGGTGTGGTTTTTGGTATCTCAATGTCATTAAAGACATCTTATAATACTGTT 300
FSC200 GTTCTAACAGGTGTGGTTTTTGGTATCTCAATGTCATTAAAGACATCTTATAATACTGTT 300
OSU18 GTTCTAACAGGTGTGGTTTTTGGTATCTCAATGTCATTAAAGACATCTTATAATACTGTT 300
R13-38 GTTCTAACAGGTGTGGTTTTTGGTATCTCAATGTCATTAAAGACATCTTATAATACTGTT 300

LVS GCCTGTGGTATTATGCTGGCATTAGTAAGCCTTTTGAGGTGGGGAAAAGGTTGATTTT 360
FSC200 GCCTGTGGTATTATGCTGGCATTAGTAAGCCTTTTGAGGTGGGGAAAAGGTTGATTTT 360
OSU18 GCCTGTGGTATTATGCTGGCATTAGTAAGCCTTTTGAGGTGGGGAAAAGGTTGATTTT 360
R13-38 GCCTGTGGTATTATGCTGGCATTAGTAAGCCTTTTGAGGTGGGGAAAAGGTTGATTTT 360

LVS GGC GGAATCAAAGGTACTGTTAAATCAATTGGTTTTTTGTATACTAAGCTTGATGATGAG 420
FSC200 GGC GGAATCAAAGGTACTGTTAAATCAATTGGTTTTTTGTATACTAAGCTTGATGATGAG 420
OSU18 GGC GGAATCAAAGGTACTGTTAAATCAATTGGTTTTTTGTATACTAAGCTTGATGATGAG 420
R13-38 GGC GGAATCAAAGGTACTGTTAAATCAATTGGTTTTTTGTATACTAAGCTTGATGATGAG 420

LVS GATGGTAA TGAAAT TGTAATCTCAAACAACCTTGTTCTATCTAAGGTAATTA CTAGATTT 480
FSC200 GATGGTAA TGAAAT TGTAATCTCAAACAACCTTGTTCTATCTAAGGTAATTA CTAGATTT 480
OSU18 GATGGTAA TGAAAT TGTAATCTCAAACAACCTTGTTCTATCTAAGGTAATTA CTAGATTT 480
R13-38 GATGGTAA TGAAAT TGTAATCTCAAACAACCTTGTTCTATCTAAGGTAATTA CTAGATTT 480

LVS ACTCAAACAGATAAATAA 498
FSC200 ACTCAAACAGATAAATAA 498
OSU18 ACTCAAACAGATAAATAA 498
R13-38 ACTCAAACAGATAAATAA 498

```

**Figure S1:** Alignment of the first putative mechanosensitive channel in *F. tularensis* subsp. *holarctica* strains. No differences were found. The locus tags of compared loci are as follows: FTL\_1753/FTL\_RS08965 (LVS), FTS\_RS08945 (FSC200), FTH\_RS08925 (OSU18) and RB23\_RS05230 (R13-38).

```

LVS ATGCCTTTATATAATGAAATGCTTTTCAACATAATATCAACGTTTATCAATATAATATTA 60
FSC200 ATGCCTTTATATAATGAAATGCTTTTCAACATAATATCAACGTTTATCAATATAATATTA 60
OSU18 ATGCCTTTATATAATGAAATGCTTTTCAACATAATATCAACGTTTATCAATATAATATTA 60
R13-38 ATGCCTTTATATAATGAAATGCTTTTCAACATAATATCAACGTTTATCAATATAATATTA 60

LVS ATAACTATAGTCGCTAGCTTAGCTTTTTACTTACTAAAAAAACGCGCAACATCTACTAAA 120
FSC200 ATAACTATAGTCGCTAGCTTAGCTTTTTACTTACTAAAAAAACGCGCAACATCTACTAAA 120
OSU18 ATAACTATAGTCGCTAGCTTAGCTTTTTACTTACTAAAAAAACGCGCAACATCTACTAAA 120
R13-38 ATAACTATAGTCGCTAGCTTAGCTTTTTACTTACTAAAAAAACGCGCAACATCTACTAAA 120

LVS CAAATCAAAAAAATTAAATTGCGAGTGATTTATTTAAGTATAAATTATTTTTTTTCTAGTT 180
FSC200 CAAATCAAAAAAATTAAATTGCGAGTGATTTATTTAAGTATAAATTATTTTTTTTCTAGTT 180
OSU18 CAAATCAAAAAAATTAAATTGCGAGTGATTTATTTAAGTATAAATTATTTTTTTTCTAGTT 180
R13-38 CAAATCAAAAAAATTAAATTGCGAGTGATTTATTTAAGTATAAATTATTTTTTTTCTAGTT 180

LVS GTTATAAAAAATTTGGCTTGGTGGAATAACTAACTTATTTACAATGTTAAGTTTAGTTGCA 240
FSC200 GTTATAAAAAATTTGGCTTGGTGGAATAACTAACTTATTTACAATGTTAAGTTTAGTTGCA 240
OSU18 GTTATAAAAAATTTGGCTTGGTGGAATAACTAACTTATTTACAATGTTAAGTTTAGTTGCA 240
R13-38 GTTATAAAAAATTTGGCTTGGTGGAATAACTAACTTATTTACAATGTTAAGTTTAGTTGCA 240

LVS GCTGGTCTGATAATCGTTAATAAAGAAACTGTTATGAATTTTGGTTGGTTGGATTATCATC 300
FSC200 GCTGGTCTGATAATCGTTAATAAAGAAACTGTTATGAATTTTGGTTGGTTGGATTATCATC 300
OSU18 GCTGGTCTGATAATCGTTAATAAAGAAACTGTTATGAATTTTGGTTGGTTGGATTATCATC 300
R13-38 GCTGGTCTGATAATCGTTAATAAAGAAACTGTTATGAATTTTGGTTGGTTGGATTATCATC 300

LVS AATTGGCGCAGCCTATTTTCTGAGGGTGACTATATTGAGGTACAAAATTATCATGGCTAT 360
FSC200 AATTGGCGCAGCCTATTTTCTGAGGGTGACTATATTGAGGTACAAAATTATCATGGCTAT 360
OSU18 AATTGGCGCAGCCTATTTTCTGAGGGTGACTATATTGAGGTACAAAATTATCATGGCTAT 360
R13-38 AATTGGCGCAGCCTATTTTCTGAGGGTGACTATATTGAGGTACAAAATTATCATGGCTAT 360

LVS GTTAGTGAGATAAAAAGTATTTTATTTTAGGATGTATGAAACTATTGAGCATGGTGATAAA 420
FSC200 GTTAGTGAGATAAAAAGTATTTTATTTTAGGATGTATGAAACTATTGAGCATGGTGATAAA 420
OSU18 GTTAGTGAGATAAAAAGTATTTTATTTTAGGATGTATGAAACTATTGAGCATGGTGATAAA 420
R13-38 GTTAGTGAGATAAAAAGTATTTTATTTTAGGATGTATGAAACTATTGAGCATGGTGATAAA 420

LVS AGAACAACTGGGAAACTCTTAAATAGTAATTACAAGTATTATTAA 465
FSC200 AGAACAACTGGGAAACTCTTAAATAGTAATTACAAGTATTATTAA 465
OSU18 AGAACAACTGGGAAACTCTTAAATAGTAATTACAAGTATTATTAA 465
R13-38 AGAACAACTGGGAAACTCTTAAATAGTAATTACAAGTATTATTAA 465

```

**Figure S2:** Alignment of the second putative mechanosensitive channel in *F. tularensis* subsp. *holarctica* strains. No differences were found. The locus tags of compared loci are as follows: FTL\_0945/FTL\_RS04830 (LVS), FTS\_RS04840 (FSC200), FTH\_RS04840 (OSU18), RB23\_RS01900 (R13-38).

```

LVS TTGGCTACTGAGAACTATTTTGTGTCACAGAACCTAGTTTATTTAGGTTTCTATATAAA 60
FSC200 TTGGCTACTGAGAACTATTTTGTGTCACAGAACCTAGTTTATTTAGGTTTCTATATAAA 60
OSU18 -----TTGTGTCACAGAACCTAGTTTATTTAGGTTTCTATATAAA 39

LVS AGTAAAAATATTGCTATCGAAAAGAAAAAGCTGAAACAAAAGATGGTTATGATGATTTT 120
FSC200 AGTAAAAATATTGCTATCGAAAAGAAAAAGCTGAAACAAAAGATGGTTATGATGATTTT 120
OSU18 AGTAAAAATATTGCTATCGAAAAGAAAAAGCTGAAACAAAAGATGGTTATGATGATTTT 99

LVS AGAGATATCAATGCTATATTTAAAGCTTTAGAGCTTGGAGCTATAGTAGTTTCAGTTATA 180
FSC200 AGAGATATCAATGCTATATTTAAAGCTTTAGAGCTTGGAGCTATAGTAGTTTCAGTTATA 180
OSU18 AGAGATATCAATGCTATATTTAAAGCTTTAGAGCTTGGAGCTATAGTAGTTTCAGTTATA 159

LVS TTGATTTTGGCAGCTTTTCGTGTTCCCTCTTACTGCTTTAGGAGCTTTTCAGTGGTGTGGCC 240
FSC200 TTGATTTTGGCAGCTTTTCGTGTTCCCTCTTACTGCTTTAGGAGCTTTTCAGTGGTGTGGCC 240
OSU18 TTGATTTTGGCAGCTTTTCGTGTTCCCTCTTACTGCTTTAGGAGCTTTTCAGTGGTGTGGCC 219

LVS TTGGCTGGTTTAACTCTTTCGCAAAGTACTCTGTTGACAAAATCTATTTGGAGGCTTGTGTT 300
FSC200 TTGGCTGGTTTAACTCTTTCGCAAAGTACTCTGTTGACAAAATCTATTTGGAGGCTTGTGTT 300
OSU18 TTGGCTGGTTTAACTCTTTCGCAAAGTACTCTGTTGACAAAATCTATTTGGAGGCTTGTGTT 279

LVS GTAGTATTTAATCGTAAATATCTGAGGGCGATATTATTTCTTCAGAGATAAATTCGACA 360
FSC200 GTAGTATTTAATCGTAAATATCTGAGGGCGATATTATTTCTTCAGAGATAAATTCGACA 360
OSU18 GTAGTATTTAATCGTAAATATCTGAGGGCGATATTATTTCTTCAGAGATAAATTCGACA 339

LVS ATTAAATTTAGTGGTACTATCAAAAAAATGGTACCTTAACTACTAGAGTTGATAAATCT 420
FSC200 ATTAAATTTAGTGGTACTATCAAAAAAATGGTACCTTAACTACTAGAGTTGATAAATCT 420
OSU18 ATTAAATTTAGTGGTACTATCAAAAAAATGGTACCTTAACTACTAGAGTTGATAAATCT 399

LVS GAAACAGCACCAATGCATATTCCAAATTCGGTGTGTTCTTAATACTTGTATAACAACAACA 480
FSC200 GAAACAGCACCAATGCATATTCCAAATTCGGTGTGTTCTTAATACTTGTATAACAACAACA 480
OSU18 GAAACAGCACCAATGCATATTCCAAATTCGGTGTGTTCTTAATACTTGTATAACAACAACA 459

LVS TCACGTCGAACTCATAGGCGCATAGTACAGTTTATAACTATGATTATAAACATATTGAT 540
FSC200 TCACGTCGAACTCATAGGCGCATAGTACAGTTTATAACTATGATTATAAACATATTGAT 540
OSU18 TCACGTCGAACTCATAGGCGCATAGTACAGTTTATAACTATGATTATAAACATATTGAT 519

LVS AAAATCCCTGTTATTTAAACAAAAGCTTTTAGAGATACTTAAATCACATCCAAATATTGAC 600
FSC200 AAAATCCCTGTTATTTAAACAAAAGCTTTTAGAGATACTTAAATCACATCCAAATATTGAC 600
OSU18 AAAATCCCTGTTATTTAAACAAAAGCTTTTAGAGATACTTAAATCACATCCAAATATTGAC 579

LVS CAGAATAAAACTTTAGCTGTCTCATTAGCATCAGGAGGTACCAATATTTCTGGTAAGCTA 660
FSC200 CAGAATAAAACTTTAGCTGTCTCATTAGCATCAGGAGGTACCAATATTTCTGGTAAGCTA 660
OSU18 CAGAATAAAACTTTAGCTGTCTCATTAGCATCAGGAGGTACCAATATTTCTGGTAAGCTA 639

LVS GAGGGTAGTTTTGGTAGTAGTGGTATTAATATACAAAATTTATGCGATGGTTAATAAAGTT 720
FSC200 GAGGGTAGTTTTGGTAGTAGTGGTATTAATATACAAAATTTATGCGATGGTTAATAAAGTT 720
OSU18 GAGGGTAGTTTTGGTAGTAGTGGTATTAATATACAAAATTTATGCGATGGTTAATAAAGTT 699

LVS TTCTTTAGTGACTTTTATCAATGTTTCCAGGATGAAATTTTATAAATATTGCCAAAGAATTA 780
FSC200 TTCTTTAGTGACTTTTATCAATGTTTCCAGGATGAAATTTTATAAATATTGCCAAAGAATTA 780
OSU18 TTCTTTAGTGACTTTTATCAATGTTTCCAGGATGAAATTTTATAAATATTGCCAAAGAATTA 759

LVS AATGATTTAGATATAGAGTTTGCATAAATCCAGTTACGTTACATAAATATTAG 834
FSC200 AATGATTTAGATATAGAGTTTGCATAAATCCAGTTACGTTACATAAATATTAG 834
OSU18 AATGATTTAGATATAGAGTTTGCATAAATCCAGTTACGTTACATAAATATTAG 813

```

**Figure S3:** Alignment of the third putative mechanosensitive channel in *F. tularensis* subsp. *holarctica* strains. Differences are highlighted in black. The locus tags of compared loci are as follows: FTL\_1588 /FTL\_RS08095 (LVS), FTS\_RS08075 (FSC200) and FTH\_RS08065(OSU18). A gap in the R13-38 WGS assembly precluded this strain from comparison.

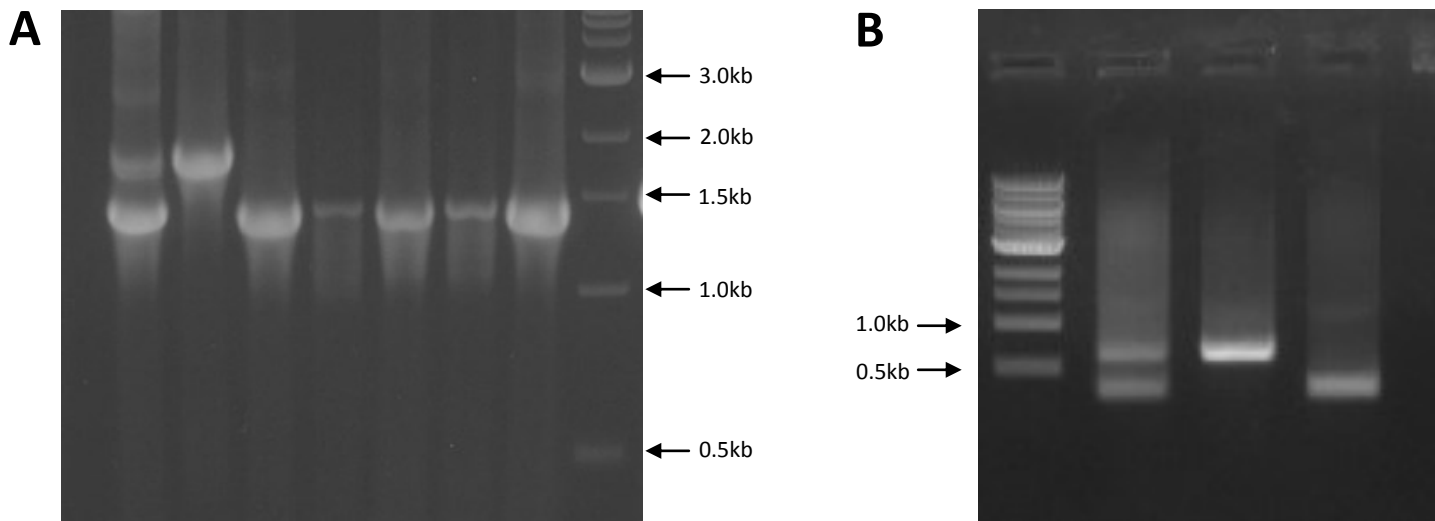

**Figure S4:** pictures of gels demonstrating deletion of FTL\_1753 and FTL\_0945. Genomic DNA was isolated from wild-type LVS, primary recombinants and secondary recombinants and amplified with the primers indicated. **A)** FTL\_1753 (*FtMscS*) deletion. DNA was amplified with the 1753\_UP\_F & 1753\_DOWN\_R primers, yielding a WT band of ~2000 BP and a deletion band of ~1500 BP. Lane 1: primary recombinant with both bands. Lane 2: WT DNA template. Lanes 3-7: secondary recombinants with the deletion. **B)** FTL\_0945 deletion. DNA was amplified with the 0945\_SCREEN\_F and 0945\_SCREEN\_R primers, yielding a WT band of ~670 BP and a deletion band of ~330 BP. Lane 1: primary recombinant with both bands. Lane 2: WT DNA template. Lane 3: secondary recombinant with the deletion.

|                 | MIC ( $\mu\text{g/mL}$ ) |                           |                           |
|-----------------|--------------------------|---------------------------|---------------------------|
|                 | WT                       | $\Delta\text{FTL}_{1753}$ | $\Delta\text{FTL}_{0945}$ |
| gentamicin      | 4                        | 4                         | 4                         |
| kanamycin       | 8                        | 16                        | 8                         |
| streptomycin    | 16                       | 16                        | 16                        |
| tetracycline    | 0.5                      | 0.5                       | 0.5                       |
| erythromycin    | >16                      | >16                       | >16                       |
| chloramphenicol | 2                        | 2                         | 2                         |
| trimethoprim    | >16                      | >16                       | >16                       |
| polymyxin B     | >16                      | >16                       | >16                       |
| ampicillin      | >16                      | >16                       | >16                       |

**Table S1:** Minimum Inhibitory Concentrations (MICs) of WT LVS and the  $\Delta\text{FTL}_{1753}$  and  $\Delta\text{FTL}_{0945}$  strains to indicated antibiotics.



```

holarctica MFDQLGNSGAFLINAIVAVVILVVGFWASKYIKSIVYSSL 40
tularensis MFDQLGNSGAFLINAIVAVVILVVGFWASKYIKSLVYSSL 40
novicida MFDQLGNSGAFLINAIVAVVILVVGFWASKYIKSLVYSSL 40

holarctica KEYDKTVSQFLASLVYTI FLVLVVVIALAKLGVPI SPVTG 80
tularensis KEYDKTVSQFLASLVYTI FLVLVVVIALAKLGVPI SPVTG 80
novicida KEYDKTVSQFLASLVYTI FLVLVVVIALAKLGVPI SPVTG 80

holarctica VLTGVVFGISM SLKTSYNTVACGIMLAFSKPFEVGEKVDF 120
tularensis VLTGVVFGISM SLKTSYNTVACGIMLAFSKPFEVGEKVDF 120
novicida VLTGVVFGISM SLKTSYNTVACGIMLAFSKPFEVGERVDF 120

holarctica GGIKGTVKSIGFLYTKLDDDEDGNEIVISNNLVLSKVITRF 160
tularensis GGIKGTVKSIGFLYTKLDDDEDGNEIVISNNLVLSKVITRF 160
novicida GGIKGTVKSIGFLYTKLDDDEDGNEIVISNNLVLSKVITRF 160

holarctica TQTDK 165
tularensis TQTDK 165
novicida TQTDK 165

```

**Figure S5:** Protein-level alignment of FTL\_1753 (*FtMscS*) to equivalent genes in subsp. *tularensis* SchuS4 and subsp. *novicida* U112. Substitutions involving similar amino acids are highlighted gray, while substitutions involving dissimilar amino acids or gaps are shaded black using default parameters in Multiple Align Show ([http://www.bioinformatics.org/sms/multi\\_align.html](http://www.bioinformatics.org/sms/multi_align.html)). The locus tags/protein IDs used are as follows: subsp. *holarctica*: FTL\_1753/FTL\_RS08965/WP\_003017262.1; subsp. *tularensis* *in silico* translated from FTT\_0135; subsp. *novicida* FTN\_1581/FTN\_RS08090/WP\_003041103.1

```

holarctica MPLYNEMLFNIISTFINIILITIVASLAFYLLKKRATSTK 40
tularensis MPLYNEMLFNIISTFINIVLITIVASLAFYLLKKRATSTK 40
novicida MPLYNEMLFNIISTFINIVLITIVASLAFYLLKKRATSTK 40

holarctica QIKKIKLRVIYLSIIFFFLVVIKIWLGGITNLFTMLSLVA 80
tularensis QIKKIKSRVIYLSIIFFFLVVIKIWLGGITNLFTMLSLVA 80
novicida QIKKIKSRVIYLSIIFFFLAVIKIWLGGITNLFTMLSLVA 80

holarctica AGLIIVNKETVMNFVGVWIIINWRS LFSEGDYIEVQNYHGY 120
tularensis AGLIIVNKETVMNFVGVWIIINWRS LFSEGDYIEVQNYHGY 120
novicida AGLIIVNKETVMNFVGVWIIINWRS LFSEGDYIEVQNYHGY 120

holarctica VSEIKVVFYFRMYETIEHGDKRTTGKLLNSNYKYY----- 154
tularensis VSKIKVVFYFRMYETIEHGDKRTTGKLLNSNYKYY----- 154
novicida VSEIKVVFYFRMYETIEHGDKRTTGKLLKLPNSIVITSIIK 160

holarctica ----- 154
tularensis ----- 154
novicida TFSSDENIALHKVPWLISIEKDPLEVAQKLEQLIKRIIAD 200

holarctica ----- 154
tularensis ----- 154
novicida KYFFSSDFSKSSVINKSKLKNYGINDFTPYIEIKTFNDKE 240

holarctica ----- 154
tularensis ----- 154
novicida NVINIQANFYCYVEHRKEIEQAYTRELINIINSEAFS 277

```

**Figure S6:** Protein-level alignment of FTL\_0945 to equivalent loci in subsp. *tularensis* SchuS4 and subsp. *novicida* U112. Substitutions involving similar amino acids are highlighted gray, while substitutions involving dissimilar amino acids or gaps are shaded black using default parameters in Multiple Align Show ([http://www.bioinformatics.org/sms/multi\\_align.html](http://www.bioinformatics.org/sms/multi_align.html)). The locus tags/protein IDs used are as follows: subsp. *holarctica*: FTL\_0945/FTL\_RS04830/WP\_003015729.1; subsp. *tularensis* FTT\_0670c/YP\_169687.1; subsp *novicida* FTN\_1012/FTN\_RS05215/WP\_003039467.1

|            |                                                                                                                                                                                                                                                                                          |     |
|------------|------------------------------------------------------------------------------------------------------------------------------------------------------------------------------------------------------------------------------------------------------------------------------------------|-----|
| holarctica | MA-----                                                                                                                                                                                                                                                                                  | 2   |
| tularensis | MNLLNNILLRVENYSTTYILLIDFVICLVLSVIISLLGSL                                                                                                                                                                                                                                                 | 40  |
| novicida   | MNLLNNILLRVENYSTTYILLIDFVICLVLSVIISLLGSL                                                                                                                                                                                                                                                 | 40  |
| holarctica | -----                                                                                                                                                                                                                                                                                    | 2   |
| tularensis | LVIKHKDTIRYSFVKSFKLTLYLVIWSYFIKTCVDLPVIV                                                                                                                                                                                                                                                 | 80  |
| novicida   | LVIKHKDTIRYSFVKSFKLTLYLVIWSYFIKTCVDLPVIV                                                                                                                                                                                                                                                 | 80  |
| holarctica | -----TEKLF-----LCTEPSLFRFLYKSKNIA                                                                                                                                                                                                                                                        | 25  |
| tularensis | HLPDYKEVIVSYS <span style="background-color: gray;">DKIF</span> <span style="background-color: black;">DF</span> FCIYL <span style="background-color: black;">L</span> A <span style="background-color: black;">I</span> I <span style="background-color: black;">I</span> SLFRFLYKSKNIA | 120 |
| novicida   | HLPDYKEVIVSYS <span style="background-color: gray;">DKIF</span> <span style="background-color: black;">DF</span> FCIYL <span style="background-color: black;">L</span> A <span style="background-color: black;">I</span> I <span style="background-color: black;">I</span> SLFRFLYKSKNIA | 120 |
| holarctica | IEKKAETKDGyddFRDINAIFKALELGAIVVSvililAA                                                                                                                                                                                                                                                  | 65  |
| tularensis | IEKKAETKDGyddFRDINAIFKALELGAIVVSvililAA                                                                                                                                                                                                                                                  | 160 |
| novicida   | IEKKAETKDGyddFRDINAIFKALELGAIVVSvililAA                                                                                                                                                                                                                                                  | 160 |
| holarctica | FRVPLTALGAFSGVALAGLTLSQSTLLTNLFGGLFVVFNr                                                                                                                                                                                                                                                 | 105 |
| tularensis | FRAPLTALGAFSGVALAGLTLSQSTLLTNLFGGLFVVFNr                                                                                                                                                                                                                                                 | 200 |
| novicida   | FRVPLTALGAFSGVALAGLTLSQSTLLTNLFGGLFVVFNr                                                                                                                                                                                                                                                 | 200 |
| holarctica | KYSEGDIISSEINSTIKFSGTIKKIGTLTTRVDNSETAPM                                                                                                                                                                                                                                                 | 145 |
| tularensis | KYSEGDIISSEINSTIKFSGTIKKIGTLTTRVDNSETAPM                                                                                                                                                                                                                                                 | 240 |
| novicida   | KYSEGDIISSEINSTIKFSGTIKKIGTLTTRVDNSETAPM                                                                                                                                                                                                                                                 | 240 |
| holarctica | HIPNSVFLNTCITTTSRRTHRRIVQFITIDYKHIDKIPVI                                                                                                                                                                                                                                                 | 185 |
| tularensis | HIPNSVFLNTCITTTSRRTHRRIVQFITIDYKHIDKIPVI                                                                                                                                                                                                                                                 | 280 |
| novicida   | HIPNSVFLNTCITTTSRRTHRRIVQFITIDYKHIDKIPVI                                                                                                                                                                                                                                                 | 280 |
| holarctica | KQKLEILKSHPNIDQNKTlavslasGGTNIsgklegSFG                                                                                                                                                                                                                                                  | 225 |
| tularensis | KQKLEILKSHPNIDQNKTlavslasGGTNIsgklegSFG                                                                                                                                                                                                                                                  | 320 |
| novicida   | KQKLEILKSHPNIDQNKTlavslasGGTNIsgklegSFG                                                                                                                                                                                                                                                  | 320 |
| holarctica | SSGINIQIYAMVNKVFfSDFINVQDEIFINIakELNDLDI                                                                                                                                                                                                                                                 | 265 |
| tularensis | SSGINIQIYAMVNKVFfSDFINVQDEIFINIakELNDLDI                                                                                                                                                                                                                                                 | 360 |
| novicida   | SSGINIQIYAMVNKVFfSDFINVQDEIFINIakELNDLDI                                                                                                                                                                                                                                                 | 360 |
| holarctica | EFAINPVTLHKY                                                                                                                                                                                                                                                                             | 277 |
| tularensis | EFAINPVTLHKY                                                                                                                                                                                                                                                                             | 372 |
| novicida   | EFAINPVTLHKY                                                                                                                                                                                                                                                                             | 372 |

**Figure S7:** Protein-level alignment of FTL\_1588 to equivalent loci in subsp. *tularensis* SchuS4 and subsp. *novicida* U112. Substitutions involving similar amino acids are highlighted gray, while substitutions involving dissimilar amino acids or gaps are shaded black using default parameters in Multiple Align Show ([http://www.bioinformatics.org/sms/multi\\_align.html](http://www.bioinformatics.org/sms/multi_align.html)). The locus tags/protein IDs used are as follows: subsp. *holarctica*: FTL\_1588/FTL\_RS08095/WP\_080502286.1; subsp. *tularensis* FTT\_0475/YP\_169513.1; subsp. *novicida* FTN\_0566/FTN\_RS02930/WP\_003033340.1



|            |                                          |     |
|------------|------------------------------------------|-----|
| holarctica | MSLLKKYYFDIINNHGFSVALSCLTIILIVLLLSFIINRL | 40  |
| tularensis | MSLLKKYYFDIINNHGFSVALSCLTIILIVLLLSFIINRL | 40  |
| novicida   | MSLLKKYYFDIINNHGFSVALSCLTIILIVLLLSFIINRL | 40  |
| holarctica | ASKYIVLIAKKFFDKSNSMLGKYLLEYKFFVKLSHIIPGI | 80  |
| tularensis | SSKYIVLIAKKFFDKSNSMLGKYLLEYKFFVKLSHIIPGI | 80  |
| novicida   | ASKYIVLIAKKFFDKSNSMLGKYLLEYKFFVKLSHIIPGI | 80  |
| holarctica | FAYVIIGFATDNDYLWTQHLVTGLQLLLQIYITVTIISFL | 120 |
| tularensis | FAYVIIGFATDNDYLWTQHLVTGLQLLLQIYITVTIISFL | 120 |
| novicida   | FAYVIIGFSTDNDYLWTQHLVTGLQLLLQIYITVTIISFL | 120 |
| holarctica | VCFVDVFLTTLR-----ILLILKIIHYVA            | 144 |
| tularensis | VCFVDALFDYLENLAYFKNHSLRSYAQVIKIILYIIGFIL | 160 |
| novicida   | VCFVDALFDYLENLAYFKNHSLRSYAQVIKIILYIIGFIL | 160 |
| holarctica | MLK-----                                 | 147 |
| tularensis | VVSLLLNKSPIAFLTGLGALSAVLMLVFKDTILGFVTNVQ | 200 |
| novicida   | VVSLLLNKSPIAFLTGLGALSAVLMLVFKDTILGFVTNVQ | 200 |
| holarctica | -----                                    | 147 |
| tularensis | VAALDLVRVGDWITIPSANVDGTVMVDSINTVKIRNFDKT | 240 |
| novicida   | VAALDLVRVGDWITIPSANVDGTVMVDSINTVKIRNFDKT | 240 |
| holarctica | -----                                    | 147 |
| tularensis | ISMIPYTLTTHSVQNWRGMVETGGRRIKRSINIDIDTIK  | 280 |
| novicida   | ISMIPYTLTTHSVQNWRGMVETGGRRIKRSINIDIDTIK  | 280 |
| holarctica | -----                                    | 147 |
| tularensis | FCDQELLERLGKETLLADFIKAKANEKLTNISLFRAYIEN | 320 |
| novicida   | FCDQELLERLGKETLLADFIKAKANEKLTNISLFRAYIEN | 320 |
| holarctica | -----                                    | 147 |
| tularensis | YLRNQPKIHLGLTFLIRELQPTQFGLPVELYIFTNDTNWV | 360 |
| novicida   | YLRNHPKIHLGLTFLIRELQPTQFGLPVELYIFTNDTNWV | 360 |
| holarctica | -----                                    | 147 |
| tularensis | NYEKIQADIFDYVFASLHMFDLKAFQAITGRINNQF     | 396 |
| novicida   | NYEKIQAEIFDYVFASLHMFDLKAFQAITGRINNQF     | 396 |

**Figure S8:** Protein-level alignment of FTL\_1209 to equivalent loci in subsp. *tularensis* SchuS4 and subsp. *novicida* U112. Substitutions involving similar amino acids are highlighted gray, while substitutions involving dissimilar amino acids or gaps are shaded black using default parameters in Multiple Align Show ([http://www.bioinformatics.org/sms/multi\\_align.html](http://www.bioinformatics.org/sms/multi_align.html)). The locus tags/protein IDs used are as follows: subsp. *holarctica*: in silico translated from FTL\_1209/FTL\_RS06185; subsp. *tularensis* FTT\_0992/YP\_169980.1; subsp. *novicida* FTN\_0872/FTN\_RS04490/WP\_011733656.1
